# Supplementary material for: Choroidal Vascular Impairment in Intermediate Age-Related Macular Degeneration
Source: MDPI journal article supplement (doi:10.3390/diagnostics12051290), 2022-05-22
Supplement: s1 [file s1]

# Supplementary Data

| NUM | Gender | GROUPs | sub GROUPs | EYE | AGE | TCamm  | CLamm  | CVI    | OCTA SVP<br>Density | OCTA DVP<br>Density | OCTA CC<br>Density |
|-----|--------|--------|------------|-----|-----|--------|--------|--------|---------------------|---------------------|--------------------|
| 1   | 2      | 1      | 1 OE       |     | 76  | 1.0764 | 0.5172 | 0.4805 |                     |                     |                    |
| 2   | 1      | 1      | 1 OE       |     | 66  | 0.9715 | 0.4698 | 0.4836 | 0.2583              | 0.2734              | 0.3512             |
| 3   | 1      | 1      | 1 OE       |     | 88  | 1.0210 | 0.4715 | 0.4617 | 0.2683              | 0.2880              | 0.3667             |
| 4   | 1      | 1      | 1 OE       |     | 74  | 1.7308 | 0.7231 | 0.4178 | 0.3038              | 0.3023              | 0.3946             |
| 5   | 1      | 1      | 1 OD       |     | 85  |        |        |        | 0.2137              | 0.2586              | 0.3393             |
| 6   | 2      | 1      | 1 OD       |     | 82  | 1.5936 | 0.6596 | 0.4139 | 0.2944              | 0.3003              | 0.3936             |
| 7   | 1      | 1      | 1 OE       |     | 75  | 1.2871 | 0.5900 | 0.4584 | 0.3094              | 0.2958              | 0.3577             |
| 8   | 2      | 1      | 1 OD       |     | 82  | 1.2486 | 0.5681 | 0.4550 |                     |                     |                    |
| 9   | 2      | 1      | 1 OD       |     | 77  | 0.4753 | 0.2290 | 0.4817 | 0.3050              | 0.2938              | 0.3729             |
| 10  | 1      | 1      | 1 OE       |     | 77  | 1.7529 | 0.7733 | 0.4412 |                     |                     |                    |
| 12  | 1      | 1      | 1 OE       |     | 79  | 0.1973 | 0.0985 | 0.4993 | 0.2852              | 0.2856              | 0.3455             |
| 13  | 1      | 1      | 1 OD       |     | 76  | 0.8441 | 0.4270 | 0.5059 | 0.2448              | 0.2618              | 0.3282             |
| 14  | 1      | 1      | 1 OD       |     | 70  | 1.2486 | 0.5681 | 0.4550 | 0.3411              | 0.3061              | 0.3796             |
| 15  | 1      | 1      | 1 OD       |     | 45  | 1.1093 | 0.5098 | 0.4596 |                     |                     |                    |
| 16  | 1      | 1      | 1 OD       |     | 83  | 1.0382 | 0.4761 | 0.4586 | 0.2819              | 0.2808              | 0.3497             |
| 17  | 1      | 1      | 1 OE       |     | 63  | 1.9686 | 0.8637 | 0.4388 |                     |                     |                    |
| 18  | 1      | 1      | 1 OD       |     | 71  | 1.3824 | 0.6951 | 0.5028 | 0.3074              | 0.2951              | 0.3732             |
| 19  | 1      | 1      | 1 OD       |     | 79  | 1.1612 | 0.5362 | 0.4617 |                     |                     |                    |
| 21  | 1      | 1      | 1 OE       |     | 81  | 0.7466 | 0.3395 | 0.4547 | 0.2812              | 0.2756              | 0.3581             |
| 22  | 1      | 1      | 1 OE       |     | 69  | 1.2357 | 0.5461 | 0.4419 |                     |                     |                    |
| 23  | 1      | 1      | 1 OE       |     | 84  | 1.4140 | 0.6120 | 0.4328 | 0.3161              | 0.3049              | 0.3825             |
| 24  | 1      | 1      | 1 OD       |     | 80  | 1.1316 | 0.4922 | 0.4349 |                     |                     |                    |
| 25  | 2      | 1      | 1 OE       |     | 82  | 1.6162 | 0.6955 | 0.4303 | 0.2257              | 0.2718              | 0.3487             |
| 27  | 1      | 1      | 1 OD       |     | 79  | 0.2346 | 0.1151 | 0.4906 | 0.2555              | 0.2579              | 0.3371             |
| 28  | 1      | 1      | 1 OE       |     | 76  | 1.1245 | 0.4791 | 0.4261 |                     |                     |                    |
| 29  | 1      | 1      | 1 OE       |     | 70  | 1.6162 | 0.6955 | 0.4303 | 0.3411              | 0.3061              | 0.3796             |
| 30  | 1      | 1      | 1 OE       |     | 83  | 1.2453 | 0.5301 | 0.4257 |                     |                     |                    |
| 31  | 1      | 1      | 1 OD       |     | 63  | 2.1973 | 0.9093 | 0.4138 |                     |                     |                    |
| 32  | 1      | 1      | 1 OE       |     | 71  | 1.8372 | 0.8090 | 0.4404 | 0.3074              | 0.2951              | 0.3732             |
| 33  | 1      | 1      | 1 OD       |     | 81  |        |        |        | 0.3098              | 0.2981              | 0.3622             |
| 34  | 1      | 1      | 1 OD       |     | 69  | 1.4027 | 0.6353 | 0.4529 | 0.2993              | 0.2976              | 0.3912             |
| 35  | 1      | 2      | 2 OE       |     | 81  | 0.3833 | 0.1660 | 0.4331 |                     |                     |                    |
| 36  | 1      | 2      | 2 OD       |     | 83  | 0.6456 | 0.2821 | 0.4370 |                     |                     |                    |
| 37  | 1      | 2      | 2 OE       |     | 84  | 0.6834 | 0.2978 | 0.4358 | 0.2844              | 0.2707              | 0.3521             |
| 38  | 2      | 2      | 2 OE       |     | 81  | 0.2842 | 0.1280 | 0.4503 |                     |                     |                    |
| 39  | 2      | 2      | 2 OE       |     | 84  | 0.2286 | 0.1240 | 0.5425 | 0.2964              | 0.3259              | 0.3542             |
| 40  | 2      | 2      | 2 OE       |     | 83  | 0.9113 | 0.4475 | 0.4911 | 0.2421              | 0.2665              | 0.3399             |
| 41  | 1      | 2      | 2 OE       |     | 64  | 1.6154 | 0.6837 | 0.4233 | 0.2702              | 0.2903              | 0.3557             |
| 42  | 1      | 2      | 2 OD       |     | 78  | 0.8409 | 0.4081 | 0.4853 | 0.2978              | 0.2899              | 0.3510             |
| 43  | 2      | 2      | 2 OE       |     | 77  | 0.2076 | 0.1043 | 0.5026 | 0.2073              | 0.2414              | 0.2804             |
| 44  | 1      | 2      | 2 OE       |     | 78  | 1.4043 | 0.6213 | 0.4424 | 0.3066              | 0.3007              | 0.3598             |
| 45  | 2      | 2      | 2 OE       |     | 77  | 0.4171 | 0.1752 | 0.4202 |                     |                     |                    |
| 46  | 2      | 2      | 2 OE       |     | 82  | 0.9070 | 0.4326 | 0.4769 |                     |                     |                    |
| 47  | 2      | 2      | 2 OE       |     | 79  | 0.2273 | 0.0967 | 0.4255 |                     |                     |                    |
| 48  | 2      | 2      | 2 OD       |     | 85  | 1.6162 | 0.6955 | 0.4303 |                     |                     |                    |
| 49  | 2      | 2      | 2 OE       |     | 90  | 1.2325 | 0.5630 | 0.4568 |                     |                     |                    |
| 51  | 1      | 2      | 2 OD       |     | 93  | 0.9834 | 0.4596 | 0.4674 |                     |                     |                    |
| 52  | 1      | 2      | 2 OD       |     | 85  | 1.0928 | 0.4322 | 0.3955 |                     |                     |                    |
| 53  | 1      | 2      | 2 OE       |     | 68  |        |        |        | 0.2914              | 0.3038              | 0.3805             |
| 54  | 2      | 2      | 2 OD       |     | 68  | 0.8482 | 0.3128 | 0.3688 | 0.3220              | 0.3171              | 0.3915             |
| 55  | 2      | 2      | 2 OE       |     | 79  | 0.6912 | 0.3173 | 0.4590 |                     |                     |                    |
| 56  | 1      | 2      | 2 OD       |     | 88  | 0.9850 | 0.3799 | 0.3857 | 0.2206              | 0.2568              | 0.3314             |
| 57  | 1      | 2      | 2 OE       |     | 87  | 0.2255 | 0.1028 | 0.4557 |                     |                     |                    |
| 58  | 1      | 2      | 2 OD       |     | 75  | 1.6966 | 0.6981 | 0.4115 |                     |                     |                    |
| 59  | 1      | 2      | 2 OD       |     | 85  | 0.6627 | 0.3251 | 0.4905 | 0.2372              | 0.2593              | 0.3158             |
| 60  | 1      | 2      | 2 OE       |     | 73  | 1.3223 | 0.5871 | 0.4440 | 0.3129              | 0.2953              | 0.2949             |
| 61  | 1      | 2      | 2 OE       |     | 70  | 1.4791 | 0.6545 | 0.4425 |                     |                     |                    |
| 62  | 1      | 2      | 2 OE       |     | 88  | 0.1433 | 0.0769 | 0.5366 |                     |                     |                    |
| 63  | 1      | 2      | 2 OE       |     | 83  | 0.2132 | 0.0970 | 0.4552 |                     |                     |                    |
| 64  | 1      | 2      | 2 OD       |     | 90  | 1.2330 | 0.5517 | 0.4474 | 0.2686              | 0.2834              | 0.3203             |
| 65  | 1      | 2      | 2 OD       |     | 75  | 1.3131 | 0.5896 | 0.4490 | 0.2030              | 0.2474              | 0.3027             |
| 66  | 1      | 2      | 2 OD       |     | 75  | 1.5462 | 0.5855 | 0.3787 | 0.2828              | 0.2930              | 0.3681             |
| 67  | 1      | 2      | 2 OD       |     | 75  | 0.7184 | 0.3105 | 0.4322 |                     |                     |                    |
| 69  | 1      | 2      | 2 OE       |     | 75  | 1.2433 | 0.5840 | 0.4697 |                     |                     |                    |
| 70  | 2      | 2      | 2 OE       |     | 73  | 0.9003 | 0.4395 | 0.4882 |                     |                     |                    |

# Supplementary Data

|     |   |   |      |    |        |        |        |        |        |        |
|-----|---|---|------|----|--------|--------|--------|--------|--------|--------|
| 71  | 1 | 2 | 2 OD | 85 | 1.4253 | 0.5900 | 0.4140 | 0.2401 | 0.2637 | 0.3488 |
| 72  | 1 | 2 | 2 OD | 81 | 0.8662 | 0.3978 | 0.4593 |        |        |        |
| 73  | 1 | 2 | 2 OD | 77 | 0.8290 | 0.3964 | 0.4782 | 0.2580 | 0.2861 | 0.3624 |
| 74  | 1 | 2 | 2 OE | 78 | 1.5826 | 0.7272 | 0.4595 | 0.2141 | 0.2521 | 0.3278 |
| 76  | 2 | 2 | 2 OD | 68 | 1.0999 | 0.5114 | 0.4649 | 0.3247 | 0.3041 | 0.3710 |
| 77  | 2 | 2 | 2 OE | 59 | 0.6790 | 0.2873 | 0.4231 | 0.2856 | 0.3027 | 0.3343 |
| 78  | 1 | 2 | 2 OD | 66 | 0.8872 | 0.4350 | 0.4903 | 0.2790 | 0.2835 | 0.3206 |
| 79  | 1 | 2 | 2 OD | 81 | 0.4526 | 0.2094 | 0.4626 |        |        |        |
| 80  | 2 | 2 | 2 OD | 81 | 0.3148 | 0.1454 | 0.4618 |        |        |        |
| 81  | 2 | 2 | 2 OD | 84 | 0.2454 | 0.1255 | 0.5112 | 0.2996 | 0.3040 | 0.3693 |
| 82  | 2 | 2 | 2 OD | 77 | 0.3013 | 0.1392 | 0.4621 | 0.2907 | 0.2946 | 0.3501 |
| 83  | 2 | 2 | 2 OD | 77 | 0.4325 | 0.1756 | 0.4060 |        |        |        |
| 84  | 2 | 2 | 2 OD | 77 | 0.2521 | 0.1076 | 0.4268 |        |        |        |
| 85  | 1 | 2 | 2 OE | 82 | 1.2993 | 0.5744 | 0.4421 |        |        |        |
| 86  | 1 | 2 | 2 OD | 87 | 0.2337 | 0.0917 | 0.3923 |        |        |        |
| 87  | 1 | 2 | 2 OE | 92 | 0.2309 | 0.1015 | 0.4394 |        |        |        |
| 88  | 1 | 2 | 2 OD | 88 | 0.2009 | 0.1082 | 0.5385 |        |        |        |
| 89  | 1 | 2 | 2 OD | 83 | 0.3698 | 0.1675 | 0.4530 |        |        |        |
| 90  | 1 | 2 | 2 OE | 83 | 0.2556 | 0.1191 | 0.4660 |        |        |        |
| 91  | 2 | 2 | 2 OD | 59 | 0.7766 | 0.3099 | 0.3990 | 0.2609 | 0.2896 | 0.3343 |
| 92  | 2 | 2 | 3 OD | 80 | 2.0528 | 0.9052 | 0.4410 | 0.2612 | 0.2799 | 0.3609 |
| 93  | 1 | 2 | 3 OE | 85 | 0.5383 | 0.2576 | 0.4786 |        |        |        |
| 94  | 2 | 2 | 3 OD | 78 | 0.5835 | 0.2634 | 0.4514 |        |        |        |
| 95  | 2 | 2 | 3 OE | 81 | 0.7343 | 0.3205 | 0.4365 | 0.2868 | 0.2999 | 0.3860 |
| 96  | 2 | 2 | 3 OE | 89 | 1.3334 | 0.6392 | 0.4794 |        |        |        |
| 97  | 2 | 2 | 3 OE | 82 | 0.9146 | 0.4029 | 0.4405 |        |        |        |
| 98  | 1 | 2 | 3 OE | 74 | 2.0164 | 0.9060 | 0.4493 |        |        |        |
| 99  | 2 | 2 | 3 OD | 82 | 0.5911 | 0.3368 | 0.5699 |        |        |        |
| 100 | 2 | 2 | 3 OE | 54 | 1.0713 | 0.4713 | 0.4399 |        |        |        |
| 101 | 1 | 2 | 3 OD | 81 | 1.1364 | 0.5237 | 0.4608 | 0.2493 | 0.2679 | 0.3394 |
| 102 | 1 | 2 | 3 OD | 88 | 0.1958 | 0.0885 | 0.4518 |        |        |        |
| 103 | 1 | 2 | 3 OE | 79 | 0.9410 | 0.3653 | 0.3882 |        |        |        |
| 104 | 1 | 2 | 3 OD | 93 | 0.5423 | 0.2512 | 0.4632 |        |        |        |
| 105 | 2 | 2 | 3 OE | 76 | 1.9862 | 0.8416 | 0.4237 |        |        |        |
| 106 | 2 | 2 | 3 OE | 65 | 1.4384 | 0.6651 | 0.4624 | 0.2971 | 0.3090 | 0.3524 |
| 107 | 2 | 2 | 3 OE | 77 | 1.4026 | 0.6101 | 0.4350 | 0.2767 | 0.2792 | 0.3777 |
| 108 | 2 | 2 | 3 OE | 77 | 1.0477 | 0.4828 | 0.4608 |        |        |        |
| 109 | 2 | 2 | 3 OD | 72 | 1.1420 | 0.5698 | 0.4990 |        |        |        |
| 110 | 2 | 2 | 3 OD | 76 | 1.0577 | 0.4815 | 0.4552 |        |        |        |
| 111 | 1 | 2 | 3 OD | 78 | 1.3981 | 0.6552 | 0.4686 | 0.3304 | 0.3230 | 0.3654 |
| 113 | 1 | 2 | 3 OE | 93 | 1.0943 | 0.5704 | 0.5213 |        |        |        |
| 115 | 2 | 2 | 3 OE | 79 | 1.2486 | 0.5681 | 0.4550 |        |        |        |
| 116 | 2 | 2 | 3 OE | 83 | 0.7315 | 0.3362 | 0.4596 |        |        |        |
| 117 | 1 | 2 | 3 OE | 73 | 0.7926 | 0.3779 | 0.4768 | 0.3040 | 0.3126 | 0.3835 |
| 118 | 1 | 2 | 3 OD | 86 | 0.7888 | 0.3319 | 0.4208 | 0.2842 | 0.2911 | 0.3454 |
| 119 | 1 | 2 | 3 OE | 87 | 0.2122 | 0.1021 | 0.4809 |        |        |        |
| 120 | 1 | 2 | 3 OD | 75 | 0.7961 | 0.3503 | 0.4400 |        |        |        |
| 121 | 1 | 2 | 3 OD | 83 |        |        |        | 0.2795 | 0.2821 | 0.3742 |
| 122 | 2 | 2 | 3 OD | 54 | 1.3842 | 0.5987 | 0.4326 |        |        |        |
| 123 | 1 | 2 | 3 OE | 88 | 0.1993 | 0.0805 | 0.4039 |        |        |        |
| 124 | 2 | 2 | 3 OD | 65 | 1.5157 | 0.6762 | 0.4462 |        |        |        |
| 125 | 1 | 2 | 3 OE | 78 | 1.9635 | 0.8505 | 0.4332 |        |        |        |
| 127 | 1 | 2 | 3 OD | 93 | 1.2256 | 0.6075 | 0.4957 | 0.3155 | 0.3164 | 0.3401 |
| 128 | 1 | 2 | 3 OE | 86 | 1.1518 | 0.5095 | 0.4424 |        |        |        |
| 129 | 2 | 2 | 3 OD | 83 | 1.1834 | 0.5302 | 0.4481 |        |        |        |
| 130 | 1 | 2 | 3 OD | 87 | 0.2313 | 0.1175 | 0.5081 |        |        |        |
